# Supplementary material for: Modulating the resistive switching stability of HfO2-based RRAM through Gd doping engineering: DFT+U
Source: Royal Society of Chemistry journal article supplement (doi:10.1039/d3cp02050a), 2023-01-01
Supplement: d3cp02050a1.pdf [file d3cp02050a1.pdf]

## Supplementary Material for

# Modulating the resistive switching stability of HfO<sub>2</sub>-based RRAM through Gd doping engineering: DFT+U

Dong-lan Zhang,<sup>a</sup> Jiong Wang,<sup>\*a</sup> Qing Wu,<sup>b</sup> Yong Du<sup>a</sup>

<sup>a</sup> State Key Laboratory of Powder Metallurgy, Central South University, Changsha 410083, China

<sup>b</sup> Information and Network Center, Central South University, Changsha, Hunan, 410083, China

\*E-mail: wangjionga@csu.edu.cn

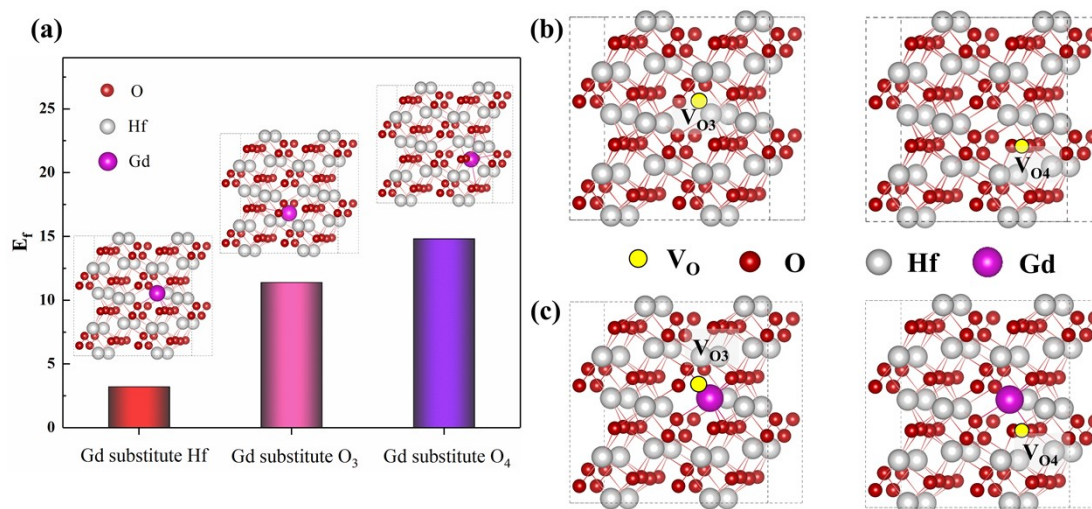

**Fig. S1** (a) The doping formation energy of Gd-doped HfO<sub>2</sub> system and the configurations of HfO<sub>2</sub> with single V<sub>O</sub> (b) before and (c) after Gd doping.

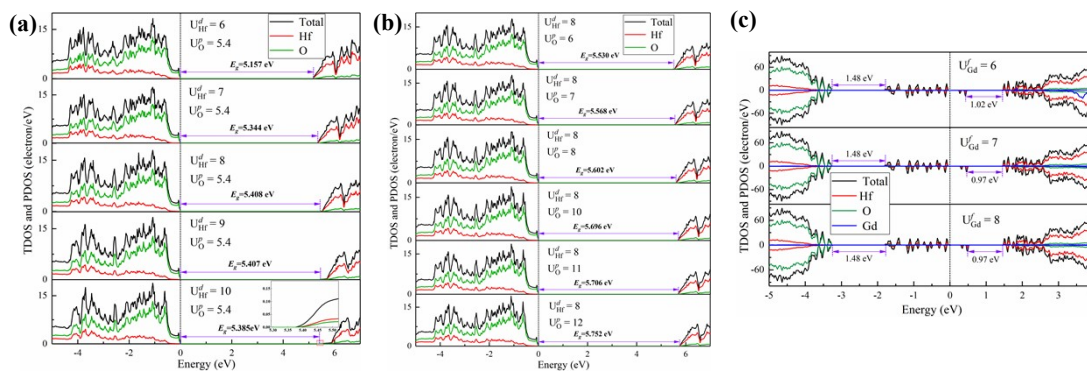

**Fig. S2** The density of states calculated with (a) different  $U^d$  and a fixed  $U^p = 5.4$  eV, (b) different  $U^p$  and a fixed  $U^d = 8$  eV and (c) different  $U^f$  and a fixed  $U^d = 8$  eV, a fixed  $U^p = 10$  eV.

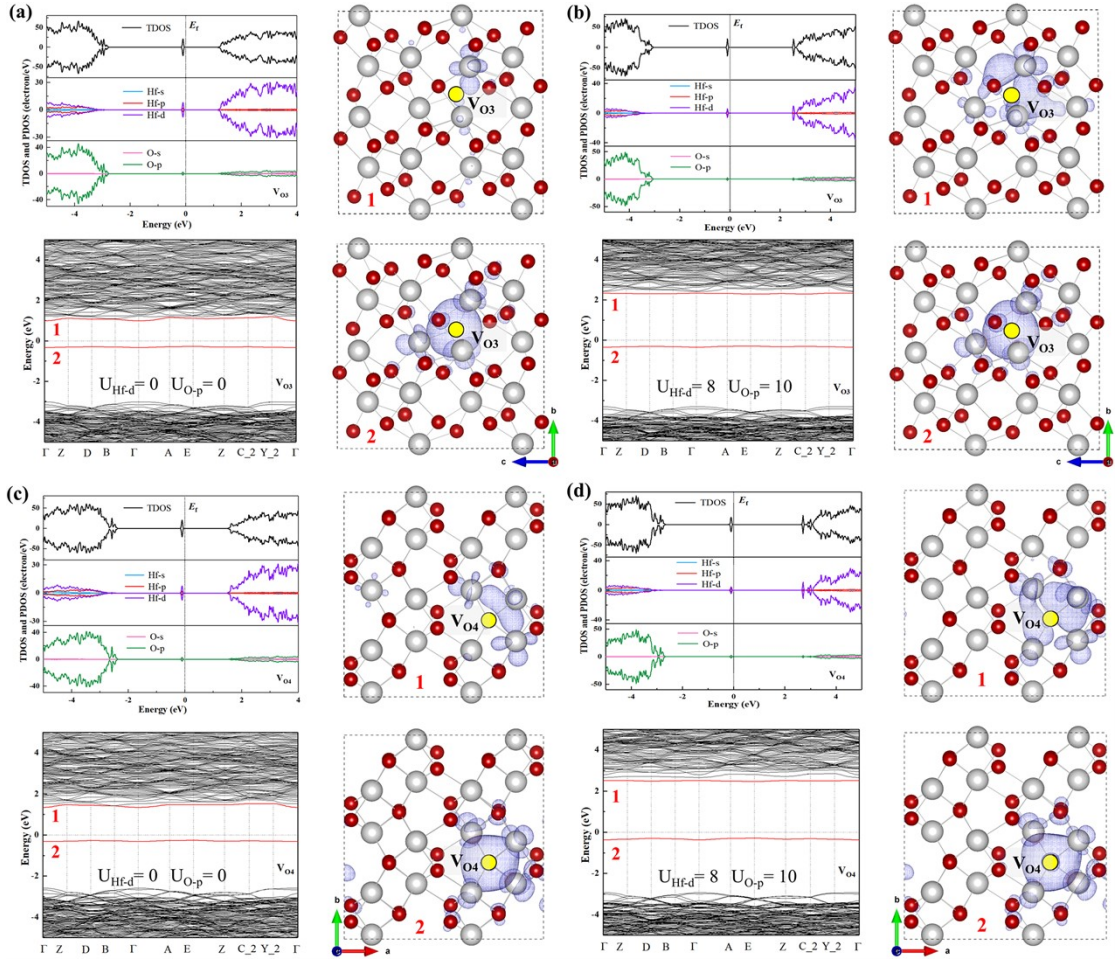

**Fig. S3** The electronic structures of  $m$ -HfO<sub>2</sub> containing (a) and (b) single V<sub>O3</sub> and (c) and (d) single V<sub>O4</sub> before and after the applying  $U^d$  and  $U^p$  value.

To further analyse the changes in the characteristics of the chemical bonding before and after Gd doping, we have analyzed the electron localization function (ELF) distributions, as shown in Fig. S4 below. The ELF value is between 0 and 1, with the upper limit value ELF=1 meaning complete electron localization, the lower limit value ELF=0 meaning complete electron delocalization or no electron, and the middle value ELF=1/2 meaning the electron-gas-like pair probability. It can be seen from Fig. S4 that compared with perfect HfO<sub>2</sub> (Figs. (a) and (d)), when the system contains V<sub>O</sub> (Figs. (b) and (e)), there will be obvious electron localization around the V<sub>O</sub>, and when Gd is doped (Figs. (c) and (f)), the electrons are not only localized around the V<sub>O</sub>, but also around the dopant Gd. There is an obvious charge interaction between Gd and its surrounding O atoms, with the Hf-O bond replaced by a Gd-O bond. The charge state of Gd and the surrounding O atoms also changes significantly compared to that before Gd doping, which will inevitably cause distortion of the local geometry, as shown in Fig. 4 in the manuscript. These results further indicate that Gd doping can cause local distortion of the geometrical configuration, strengthen the charge interaction between atoms, and improve the conductivity of the system.

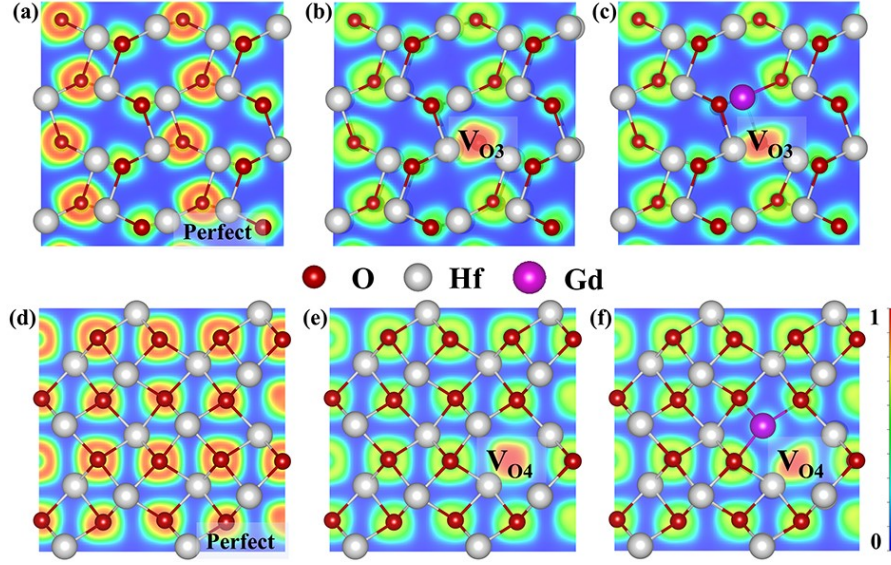

**Fig. S4** Electron localization function (ELF) distributions of (a) and (d) perfect  $m$ -HfO<sub>2</sub>, (b)  $m$ -HfO<sub>2</sub> containing single V<sub>O3</sub>, (c) Gd-doped  $m$ -HfO<sub>2</sub> containing single V<sub>O3</sub>, (e)  $m$ -HfO<sub>2</sub> containing single V<sub>O4</sub>, and (f) Gd-doped  $m$ -HfO<sub>2</sub> containing single V<sub>O4</sub>.

**Table S1** Comparative analysis of the characterization for different metal-doped RRAM devices

| Systems                                   | Method                        | Generation of V <sub>O</sub> | Randomicity of V <sub>O</sub> formation | Migration barrier of V <sub>O</sub> | Coulombic interaction | Stability of device |
|-------------------------------------------|-------------------------------|------------------------------|-----------------------------------------|-------------------------------------|-----------------------|---------------------|
| Gd-doped HfO <sub>2</sub>                 | GGA <sup>1</sup>              | ↑                            | ↓                                       | —                                   | ↑                     | ↑                   |
| Gd-doped HfO <sub>2</sub>                 | GGA+U <sup>2</sup>            | ↑                            | —                                       | —                                   | ↑                     | —                   |
| Gd-doped HfO <sub>2</sub>                 | Exp. <sup>3</sup>             | —                            | ↓                                       | ↓                                   | —                     | ↑                   |
| Gd-doped Ta <sub>2</sub> O <sub>5-x</sub> | Exp. <sup>4</sup>             | ↓                            | —                                       | ↑                                   | —                     | ↑                   |
| Mg-doped HfO <sub>x</sub>                 | Exp. and GGA-1/2 <sup>5</sup> | ↑                            | —                                       | ↑                                   | —                     | ↑                   |
| This work                                 | GGA+U                         | ↑                            | ↓                                       | ↑                                   | ↑                     | ↑                   |

Meaning of symbols:

V<sub>O</sub> represents oxygen vacancy; “↑” represents promotion (enhancement); “↓” represents suppression (reduction); “—” represents not clearly mentioned.

#### References

- 1 L. Wang, H. Tu, Y. Xiong, W. Xiao, J. Du, J. Wang and G. Huang, *J. Appl. Phys.*, 2014, **116**, 123505.
- 2 W. Zhang and Z. F. Hou, *J. Appl. Phys.*, 2014, **115**, 124104.

- 3 H. Zhang, L. Liu, B. Gao, Y. Qiu, X. Liu, J. Lu, R. Han, J. Kang and B. Yu, *Appl. Phys. Lett.*, 2011, **98**, 042105.
- 4 K. Shi, H. Xu, Z. Wang, X. Zhao, W. Liu, J. Ma and Y. Liu, *Appl. Phys. Lett.*, 2017, **111**, 223505.
- 5 L.-H. Li, K.-H. Xue, L.-Q. Zou, J.-H. Yuan, H. Sun and X. Miao, *Appl. Phys. Lett.*, 2021, **119**, 153505.
